# Supplementary material for: Enzymatic and genetic characterization of lignin depolymerization by Streptomyces sp. S6 isolated from a tropical environment
Source: PubMed Central journal article supplement (PMC7210275; doi:10.1038/s41598-020-64817-4), 2020-05-08
Supplement: 41598_2020_64817_MOESM1_ESM.pdf [file 41598_2020_64817_MOESM1_ESM.pdf]

## **Supplementary Information:**

### **Enzymatic and genetic characterization of lignin depolymerization by *Streptomyces* sp. S6 isolated from a tropical environment**

Fatimah Azizah Riyadi §, Analhuda Abdullah Tahir §, Nurtasbiyah Yusof, Nurul Syazwani Ahmad Sabri, Megat Johari Megat Mohd Noor, Fazrena Nadia MD Akhir, Nor'azizi Othman, Zuriati Zakaria, and Hirofumi Hara \*

#### **Supplementary information content:**

Table S1. Classification of predicted proteins in subsystem features and their distribution in various functional groups shown in strain S6

Table S2. Annotated genes encoding ligninolytic degrading enzymes in strain S6

Table S3. Putative genes involved in metabolism of central aromatic intermediates

Fig. S1. Growth of isolated strain S6 in solid media containing alkali lignin as sole carbon source

Fig. S2. Growth curve of strain S6 in liquid medium containing alkali lignin as sole carbon source. A non-inoculated control is shown with a square marker line.

Fig. S3. GPC chromatogram data of the isolated strain S6 at (i) Control (untreated KL without S6), (ii) day 3 and (iii) day 7.

Fig. S4: GPC chromatogram illustrating the lignin standard markers of the (a) calibration line and (b) molecular weight (1): 193 000 Da, (2): 16 200 Da, (3): 2 620 Da, (4): 953 Da, (5): 533 Da

Fig. S5. A: TIC of metabolites produced by control (untreated samples) B: TIC of metabolites produced by strain S6 from KL degradation (a) day 0, (b) day 3, and (c) day 7

**Table S1. Classification of predicted proteins in subsystem features and their distribution in various functional groups shown in strain S6**

| <b>Class</b> | <b>Value</b> | <b>Percentage</b> | <b>Description</b>                                            |
|--------------|--------------|-------------------|---------------------------------------------------------------|
| J            | 130          | 1.38              | Translation, ribosomal structure and biogenesis               |
| A            | 1            | 0.01              | RNA processing and modification                               |
| K            | 91           | 0.97              | Transcription                                                 |
| L            | 91           | 0.97              | Replication, recombination and repair                         |
| B            | 1            | 0.01              | Chromatin structure and dynamics                              |
| D            | 20           | 0.21              | Cell cycle control, cell division, chromosome partitioning    |
| V            | 20           | 0.21              | Defense mechanisms                                            |
| T            | 70           | 0.74              | Signal transduction mechanisms                                |
| M            | 79           | 0.84              | Cell wall/membrane/envelope biogenesis                        |
| N            | 4            | 0.04              | Cell motility                                                 |
| Z            | 1            | 0.01              | Cytoskeleton                                                  |
| U            | 26           | 0.28              | Intracellular trafficking, secretion, and vesicular transport |
| O            | 75           | 0.80              | Posttranslational modification, protein turnover, chaperones  |
| C            | 112          | 1.19              | Energy production and conversion                              |
| G            | 114          | 1.21              | Carbohydrate transport and metabolism                         |
| E            | 179          | 1.90              | Amino acid transport and metabolism                           |
| F            | 61           | 0.65              | Nucleotide transport and metabolism                           |
| H            | 110          | 1.17              | Coenzyme transport and metabolism                             |
| I            | 56           | 0.60              | Lipid transport and metabolism                                |
| P            | 111          | 1.18              | Inorganic ion transport and metabolism                        |
| Q            | 48           | 0.51              | Secondary metabolites biosynthesis, transport and catabolism  |
| R            | 239          | 2.54              | General function prediction only                              |
| S            | 217          | 2.31              | Function unknown                                              |
| -            | 7549         | 80.27             | Not in COGs                                                   |

**Table S2. Annotated genes encoding ligninolytic degrading enzymes in strain S6**

| Feature ID  | Function                                              | Size (amino acid) | Organism                                  | % Identity | E-value   | Accession No.  |
|-------------|-------------------------------------------------------|-------------------|-------------------------------------------|------------|-----------|----------------|
|             | <b>Peroxidase</b>                                     |                   |                                           |            |           |                |
| S6.peg.6773 | Catalase (EC:1.11.1.6)                                | 376               | <i>Streptomyces sp.</i> Dvalaa-19         | 89         | 0         | WP_029395313.1 |
| S6.peg.7686 | Catalase (EC:1.11.1.6)                                | 583               | <i>Streptomyces nanshensis</i>            | 100        | 0         | WP_070201881.1 |
| S6.peg.7939 | Catalase (EC:1.11.1.6)                                | 166               | <i>Streptomyces cavourensis</i>           | 97         | 7E-116    | RBL79238.1     |
| S6.peg.6337 | Glutathione peroxidase (EC:1.11.1.9)                  | 162               | <i>Streptomyces fulvissimus</i> DSM 40593 | 98         | 5.00E-113 | AGK75755.1     |
| S6.peg.183  | Peroxiredoxin (EC:1.11.1.15)                          | 184               | <i>Streptomyces vinaceus</i>              | 99         | 3.00E-133 | WP_043246263.1 |
| S6.peg.7259 | Peroxiredoxin (EC:1.11.1.15)                          | 161               | <i>Streptomyces sp.</i> CFMR 7            | 99         | 3.00E-112 | WP_053560427.1 |
| S6.peg.8810 | Thioredoxin-dependent thiol peroxidase (EC:1.11.1.15) | 155               | <i>Kitasatospora albolonga</i>            | 97         | 8.00E-106 | WP_084746589.1 |
| S6.peg.2209 | Catalase/peroxidase HPI (EC:1.11.1.21)                | 751               | <i>Streptomyces cavourensis</i>           | 99         | 0.00E+00  | WP_119823363.1 |
| S6.peg.1953 | Dyp-type peroxidase (EC:1.11.1.-)                     | 194               | <i>Streptomyces sp.</i> ZL-24             | 100        | 7.00E-136 | WP_103417708.1 |
| S6.peg.8041 | Deferrochelataase/peroxidase efeb (EC:1.11.1.-)       | 390               | <i>Streptomyces nanshensis</i> )          | 99         | 0         | WP_070200720.1 |
|             | <b>Dioxygenase</b>                                    |                   |                                           |            |           |                |
| S6.peg.1360 | Catechol 2,3-dioxygenase (EC:1.13.11.2)               | 328               | <i>Streptomyces bacillaris</i>            | 100        | 0         | WP_112491598.1 |
| S6.peg.7148 | Homogentisate 1,2-dioxygenase (EC:1.13.11.5)          | 353               | <i>Streptomyces nanshensis</i>            | 97         | 0         | WP_070200509.1 |
| S6.peg.2405 | Tryptophan 2,3-dioxygenase (EC:1.13.11.11)            | 195               | <i>Streptomyces sp.</i> Gb14              | 100        | 4.00E-114 | WP_097970268.1 |

|             |                                                                 |     |                                           |     |           |                |
|-------------|-----------------------------------------------------------------|-----|-------------------------------------------|-----|-----------|----------------|
| S6.peg.2711 | 4-hydroxyphenylpyruvate dioxygenase (EC:1.13.11.27)             | 381 | <i>Streptomyces cavourensis</i>           | 99  | 0         | WP_114931377.1 |
| S6.peg.8438 | Extradiol ring-cleavage dioxygenase (EC:1.13.11.-)              | 46  | <i>Streptomyces nanshensis</i>            | 100 | 2.00E-23  | OEV17013.1     |
| S6.peg.4693 | 4,5-DOPA dioxygenase extradiol (EC:1.13.11.-)                   | 200 | <i>Streptomyces nanshensis</i>            | 88  | 2.00E-109 | OEV17013.2     |
| S6.peg.303  | Taurine dioxygenase (EC:1.14.11.17)                             | 285 | <i>Streptomyces sp.</i> CFMR 7            | 98  | 0.00E+00  | WP_053559843.1 |
| S6.peg.2945 | Nitric oxide dioxygenase (EC:1.14.12.17)                        | 398 | <i>Streptomyces sp.</i> Termitarium T10T6 | 88  | 0.00E+00  | SCE61787.1     |
| S6.peg.8640 | FAD-dependent oxidoreductase                                    | 99  | <i>Streptomyces sp.</i> ZL-24             | 100 | 4.00E-46  | WP_103416421.1 |
| S6.peg.1033 | NAD(P)(also known as FAD-dependent) oxidoreductase              | 175 | <i>Streptomyces cavourensis</i>           | 98  | 2.00E-113 | WP_114930816.1 |
| S6.peg.6514 | 2-nitropropane dioxygenase                                      | 203 | <i>Streptomyces cavourensis</i>           | 95  | 5.00E-105 | WP_119825019.1 |
|             | <b>Monooxygenase</b>                                            |     |                                           |     |           |                |
| S6.peg.2995 | Amine oxidase                                                   | 564 | <i>Streptomyces cavourensis</i>           | 99  | 0.00E+00  | ATY94699.1     |
| S6.peg.6052 | Nitronate monooxygenase (EC:1.13.12.16)                         | 301 | <i>Streptomyces nanshensis</i>            | 99  | 0.00E+00  | WP_070204058.1 |
| S6.peg.8542 | L-lysine 6-monooxygenase (EC:1.14.13.59)                        | 451 | <i>Streptomyces nanshensis</i>            | 99  | 0.00E+00  | WP_070203070.1 |
| S6.peg.8154 | Alkanesulfonate monooxygenase (EC:1.14.14.5)                    | 243 | <i>Streptomyces sp.</i> CBMAI 2042        | 99  | 1.00E-174 | RLV65111.1     |
| S6.peg.8925 | Alkanesulfonate monooxygenase, FMNH(2)-dependent (EC:1.14.14.5) | 174 | <i>Streptomyces sp.</i> CBMAI 2042        | 94  | 2.00E-111 | RLV65795.1     |
| S6.peg.4879 | LLM class flavin-dependent oxidoreductase (EC:1.14.-.-)         | 134 | <i>Streptomyces sp.</i> CS090A            | 100 | 2.00E-86  | WP_109976808.1 |
| S6.peg.7494 | 4-hydroxyphenylacetate 3-monooxygenase (EC:1.14.14.9)           | 523 | <i>Amycolatopsis xylanica</i>             | 78  | 0.00E+00  | SDW49386.1     |
| S6.peg.119  | Dimethylsulfone monooxygenase sfng (EC:1.14.14.35)              | 393 | <i>Streptomyces sp.</i> ZL-24             | 99  | 0.00E+00  | WP_103418753.1 |

|             |                                                           |     |                                 |     |           |                |
|-------------|-----------------------------------------------------------|-----|---------------------------------|-----|-----------|----------------|
|             | <b>Ferroxidase (EC 1.16.3.1)</b>                          |     |                                 |     |           |                |
| S6.peg.2380 | Multicopper oxidase                                       | 128 | <i>Streptomyces bacillaris</i>  | 98  | 4.00E-85  | WP_112491679.1 |
| S6.peg.2483 | Copper oxidase                                            | 349 | <i>Streptomyces bacillaris</i>  | 99  | 0.00E+00  | WP_112489762.1 |
| S6.peg.4659 | Multicopper oxidase                                       | 410 | <i>Streptomyces nanshensis</i>  | 99  | 0.00E+00  | WP_070203310.1 |
| S6.peg.6734 | Bacterioferritin                                          | 159 | <i>Streptomyces</i>             | 100 | 5.00E-113 | WP_018486665.1 |
|             | <b>Thioredoxin-disulfide reductase (EC 1.8.1.9)</b>       |     |                                 |     |           |                |
| S6.peg.5324 | NAD(P) (also known as FAD-dependent) oxidoreductase       | 158 | <i>Streptomyces cavourensis</i> | 100 | 2.00E-102 | WP_114932953.1 |
| S6.peg.7858 | Thioredoxin-disulfide reductase                           | 323 | <i>Streptomyces sp. CFMR 7</i>  | 99  | 0.00E+00  | WP_053560343.1 |
|             |                                                           |     |                                 |     |           |                |
|             | <b>Superoxide dismutase (EC 1.15.1.1)</b>                 |     |                                 |     |           |                |
| S6.peg.8145 | Nickel superoxide dismutase                               | 131 | <i>Streptomyces</i>             | 100 | 4.00E-92  | WP_003966342.1 |
| S6.peg.9033 | Superoxide dismutase, Fe-Mn family                        | 267 | <i>Streptomyces</i>             | 100 | 7.00E-106 | WP_018487185.1 |
| S6.peg.3942 | Hypothetical protein (Superoxide dismutase, Cu-Zn family) | 174 | <i>Streptomyces bacillaris</i>  | 97  | 2.00E-117 | WP_112492618.1 |
|             | <b>Oxidases</b>                                           |     |                                 |     |           |                |
| S6.peg.2213 | Acyl coa oxidase (EC 1.3.3.6)                             | 264 | <i>Streptomyces bacillaris</i>  | 100 | 0.00E+00  | WP_112492095.1 |
| S6.peg.2478 | Acyl coa oxidase (EC 1.3.3.6)                             | 460 | <i>Streptomyces</i>             | 94  | 0.00E+00  | WP_053562175.1 |
| S6.peg.3886 | Cytochrome-c oxidase (EC 1.9.3.1) subunit I               | 429 | <i>Streptomyces purpureus</i>   | 92  | 0.00E+00  | WP_019885625.1 |
| S6.peg.6978 | Cytochrome-c oxidase (EC 1.9.3.1) subunit I               | 213 | <i>Streptomyces</i>             | 100 | 5.00E-148 | WP_084996031.1 |
| S6.peg.8843 | Cytochrome-c oxidase (EC 1.9.3.1) subunit I               | 223 | <i>Streptomyces bacillaris</i>  | 100 | 1.00E-154 | WP_112489509.1 |
| S6.peg.6979 | Cytochrome-c oxidase (EC 1.9.3.1) subunit II              | 322 | <i>Streptomyces</i>             | 100 | 0.00E+00  | WP_026237277.1 |

|             |                                                             |     |                                   |     |           |                |
|-------------|-------------------------------------------------------------|-----|-----------------------------------|-----|-----------|----------------|
| S6.peg.7964 | Cytochrome-c oxidase (EC 1.9.3.1) subunit III               | 206 | <i>Streptomyces</i>               | 100 | 1.00E-147 | WP_029395705.1 |
| S6.peg.7372 | Phenylacetyl-coa 1,2-epoxidase subunit PaaA(EC 1.14.13.149) | 202 | <i>Streptomyces cavourensis</i>   | 100 | 2.00E-146 | WP_119825571.1 |
| S6.peg.7373 | Phenylacetyl-coa 1,2-epoxidase subunit PaaA(EC 1.14.13.149) | 158 | <i>Streptomyces sp. Dvalaa-19</i> | 100 | 2.00E-112 | WP_093749646.1 |
| S6.peg.7375 | Phenylacetyl-coa 1,2-epoxidase subunit PaaC(EC 1.14.13.149) | 261 | <i>Streptomyces nanshensis</i>    | 98  | 0.00E+00  | WP_070200867.1 |
| S6.peg.2254 | Ubiquinol oxidase subunit I (EC 7.1.1.7)                    | 440 | <i>Streptomyces cavourensis</i>   | 98  | 0.00E+00  | WP_119827128.1 |
| S6.peg.9047 | Ubiquinol oxidase subunit I (EC 7.1.1.7)                    | 503 | <i>Streptomyces sp.</i>           | 100 | 0.00E+00  | WP_103418469.1 |
| S6.peg.9046 | Ubiquinol oxidase subunit II (EC 7.1.1.7)                   | 333 | <i>Streptomyces sp.</i>           | 99  | 0.00E+00  | WP_103418470.1 |
|             | <b>Oxidoreductase</b>                                       |     |                                   |     |           |                |
| S6.peg.8758 | NADH-quinone oxidoreductase subunit A (EC 7.1.1.2)          | 119 | <i>Streptomyces sp.</i>           | 100 | 1.00E-78  | WP_018490714.1 |
| S6.peg.2824 | NADH-quinone oxidoreductase subunit A (EC 7.1.1.2)          | 147 | <i>Kitasatospora albolonga</i>    | 99  | 2.00E-94  | ARF77313.1     |
| S6.peg.8759 | NADH-quinone oxidoreductase subunit B (EC 7.1.1.2)          | 184 | <i>Streptomycetaceae</i>          | 100 | 6.00E-133 | WP_018490715.1 |
| S6.peg.2823 | NADH-quinone oxidoreductase subunit B (EC 7.1.1.2)          | 238 | <i>Streptomyces bacillaris</i>    | 100 | 3.00E-170 | WP_112490556.1 |
| S6.peg.8760 | NADH-quinone oxidoreductase subunit C (EC 7.1.1.2)          | 243 | <i>Streptomyces sp. WAC04770</i>  | 99  | 1.00E-176 | WP_125621564.1 |
| S6.peg.8761 | NADH-quinone oxidoreductase subunit D (EC 7.1.1.2)          | 440 | <i>Streptomyces sp.</i>           | 100 | 0.00E+00  | WP_103416794.1 |
| S6.peg.8762 | NADH-quinone oxidoreductase subunit E (EC 7.1.1.2)          | 212 | <i>Streptomyces sp. Dvalaa-19</i> | 100 | 1.00E-154 | SCE28869.1     |
| S6.peg.9198 | NADH-quinone oxidoreductase subunit F (EC 7.1.1.2)          | 371 | <i>Streptomyces sp.</i>           | 100 | 0.00E+00  | WP_070205459.1 |

|             |                                                       |     |                                   |     |           |                |
|-------------|-------------------------------------------------------|-----|-----------------------------------|-----|-----------|----------------|
| S6.peg.9196 | NADH-quinone oxidoreductase subunit G (EC 7.1.1.2)    | 304 | <i>Streptomyces</i> sp.           | 100 | 0.00E+00  | WP_103416796.1 |
| S6.peg.3743 | NADH-quinone oxidoreductase subunit nuoh (EC 7.1.1.2) | 466 | <i>Streptomyces</i> sp.           | 100 | 0.00E+00  | WP_093755416.1 |
| S6.peg.1783 | NADH-quinone oxidoreductase subunit H (EC 7.1.1.2)    | 322 | <i>Streptomyces</i> sp. CFMR 7    | 100 | 0.00E+00  | WP_053559799.1 |
| S6.peg.3744 | NADH-quinone oxidoreductase subunit Nuol (EC 7.1.1.2) | 232 | <i>Streptomyces</i> sp. Dvalaa-19 | 100 | 3.00E-171 | WP_093755415.1 |
| S6.peg.1782 | NADH-quinone oxidoreductase subunit I (EC 7.1.1.2)    | 194 | <i>Streptomyces</i> sp. S8        | 97  | 2.00E-137 | WP_084992946.1 |
| S6.peg.2731 | NADH-quinone oxidoreductase subunit J (EC 7.1.1.2)    | 174 | <i>Streptomyces</i> sp.           | 99  | 4.00E-120 | WP_053559827.1 |
| S6.peg.3745 | NADH-quinone oxidoreductase subunit J (EC 7.1.1.2)    | 265 | <i>Streptomyces</i> sp. Ccalmp-8W | 100 | 4.00E-135 | WP_018490723.1 |
| S6.peg.1781 | NADH-quinone oxidoreductase subunit J (EC 7.1.1.2)    | 228 | <i>Streptomyces</i> sp. WAC04770  | 99  | 2.00E-154 | WP_125613897.1 |
| S6.peg.1780 | NADH-quinone oxidoreductase subunit nuok (EC 7.1.1.2) | 140 | <i>Streptomyces nanshensis</i>    | 99  | 6.00E-92  | WP_070205428.1 |
| S6.peg.2733 | NADH-quinone oxidoreductase subunit L (EC 7.1.1.2)    | 469 | <i>Streptomyces nanshensis</i>    | 100 | 0.00E+00  | WP_070205457.1 |
| S6.peg.2536 | NADH-quinone oxidoreductase subunit M (EC 7.1.1.2)    | 403 | <i>Streptomyces cavourensis</i>   | 99  | 0.00E+00  | WP_114932400.1 |
| S6.peg.7621 | NADH-quinone oxidoreductase subunit M (EC 7.1.1.2)    | 399 | <i>Streptomyces</i> sp. ZL-24     | 99  | 0.00E+00  | WP_103416831.1 |
| S6.peg.4872 | NADH-quinone oxidoreductase subunit M (EC 7.1.1.2)    | 225 | <i>Streptomyces</i> sp. ZL-25     | 89  | 1.00E-123 | WP_103416831.2 |
| S6.peg.2537 | NADH-quinone oxidoreductase subunit N (EC 7.1.1.2)    | 410 | <i>Streptomyces</i> sp. Dvalaa-19 | 100 | 0.00E+00  | SCE28773.1     |
| S6.peg.2532 | NADH-quinone oxidoreductase subunit N (EC 7.1.1.2)    | 322 | <i>Streptomyces nanshensis</i>    | 99  | 0.00E+00  | WP_070205425.1 |
| S6.peg.4536 | NADH-quinone oxidoreductase subunit N (EC 7.1.1.2)    | 321 | <i>Streptomyces nanshensis</i>    | 79  | 9.00E-167 | WP_070205425.1 |

|             | <b>Dehydrogenases</b>                                   |     |                                           |     |           |                |
|-------------|---------------------------------------------------------|-----|-------------------------------------------|-----|-----------|----------------|
| S6.peg.83   | Zn-dependent alcohol dehydrogenase (EC 1.1.1.1)         | 393 | <i>Streptomyces</i> sp.                   | 100 | 0.00E+00  | WP_103416731.1 |
| S6.peg.1690 | Zn-dependent alcohol dehydrogenase (EC 1.1.1.1)         | 281 | <i>Streptomyces nanshensis</i>            | 100 | 0.00E+00  | WP_070203349.1 |
| S6.peg.3749 | Zn-dependent alcohol dehydrogenase (EC 1.1.1.1)         | 153 | <i>Streptomyces</i> sp. SM11              | 71  | 1.00E-81  | WP_103530902.1 |
| S6.peg.275  | Alcohol dehydrogenase, propanol-preferring (EC 1.1.1.1) | 392 | <i>Streptomyces nanshensis</i>            | 99  | 0.00E+00  | WP_070203095.1 |
| S6.peg.6244 | Aryl-alcohol dehydrogenase (EC:1.1.1.90)                | 114 | <i>Streptomyces nanshensis</i>            | 69  | 1.00E-36  | WP_070200123.1 |
| S6.peg.2460 | NAD(P)-dependent alcohol dehydrogenase                  | 346 | <i>Streptomyces</i> sp.                   | 99  | 0.00E+00  | WP_103417068.1 |
| S6.peg.8465 | Aldehyde dehydrogenase family protein (EC 1.2.1.3)      | 346 | <i>Streptomyces</i> sp. CFMR 7            | 100 | 0.00E+00  | WP_053559646.1 |
| S6.peg.3475 | Aldehyde dehydrogenase family protein (EC 1.2.1.3)      | 262 | <i>Streptomyces cavourensis</i>           | 99  | 0.00E+00  | WP_114931039.1 |
| S6.peg.8336 | NAD(P)H: quinone oxidoreductase                         | 175 | <i>Streptomyces</i> sp.                   | 99  | 2.00E-177 | WP_019762064.1 |
| S6.peg.1565 | NAD(P)H dehydrogenase (quinone) (EC 1.6.5.2)            | 209 | <i>Streptomyces</i> sp.                   | 100 | 0.00E+00  | WP_053561441.1 |
| S6.peg.1070 | NADH dehydrogenase (EC 1.6.99.3)                        | 287 | <i>Streptomyces</i> sp.                   | 98  | 0.00E+00  | WP_028418913.1 |
| S6.peg.736  | NADH dehydrogenase (EC 1.6.99.3)                        | 185 | <i>Streptomyces fulvissimus</i> DSM 40593 | 98  | 1.00E-176 | AGK78793.1     |
| S6.peg.2054 | NADH dehydrogenase (EC 1.6.99.3)                        | 202 | <i>Streptomyces</i> sp. Ccalmp-8W         | 98  | 0.00E+00  | WP_018492545.1 |
| S6.peg.6000 | Dehydrogenase                                           | 111 | <i>Streptomyces cavourensis</i>           | 99  | 2.00E-91  | WP_114930664.1 |
| S6.peg.8076 | Acyl CoA dehydrogenase (EC:1.3.-.-)                     | 118 | <i>Streptomyces nanshensis</i>            | 99  | 3.00E-114 | WP_070204705.1 |
| S6.peg.1940 | Acyl CoA dehydrogenase (EC:1.3.-.-)                     | 541 | <i>Streptomyces</i> sp.                   | 99  | 0.00E+00  | WP_103419466.1 |



|             |                                                                                                  |     |                                           |     |           |                |
|-------------|--------------------------------------------------------------------------------------------------|-----|-------------------------------------------|-----|-----------|----------------|
| S6.peg.6600 | Acyl CoA dehydrogenase (EC:1.3.-.-)                                                              | 157 | <i>Streptomyces fulvissimus</i> DSM 40593 | 97  | 6.00E-92  | AGK76270.1     |
| S6.peg.6243 | NAD(P)-dependent alcohol dehydrogenase (EC:1.1.1.90)                                             | 205 | <i>Streptomyces cavourensis</i>           | 99  | 4.00E-86  | WP_114933918.1 |
| S6.peg.6367 | Aldehyde dehydrogenase                                                                           | 136 | <i>Streptomyces bacillaris</i>            | 100 | 5.00E-88  | WP_112491599.1 |
| S6.peg.6367 | Aminomuconate-semialdehyde/2-hydroxymuconate-6-semialdehyde dehydrogenase (EC:1.2.1.32 1.2.1.85) | 135 | <i>Streptomyces sp.</i> ZL-24             | 100 | 2.00E-87  | WP_103416402.1 |
| S6.peg.678  | 3-hydroxyacyl-coa dehydrogenase (EC:1.1.1.35)                                                    | 723 | <i>Streptomyces nanshensis</i>            | 99  | 0.00E+00  | WP_070201914.1 |
| S6.peg.9091 | 3-hydroxybutyryl-coa dehydrogenase (EC:1.1.1.157)                                                | 282 | <i>Streptomyces sp.</i>                   | 100 | 0         | WP_019762937.1 |
| S6.peg.334  | 3-hydroxybutyryl-coa dehydrogenase (EC:1.1.1.157)                                                | 286 | <i>Streptomyces sp.</i>                   | 100 | 0         | WP_026237483.1 |
| S6.peg.2438 | 3-hydroxybutyryl-coa dehydrogenase (EC:1.1.1.157)                                                | 247 | <i>Streptomyces nanshensis</i>            | 99  | 0         | WP_070204658.1 |
| S6.peg.5052 | 3-hydroxybutyryl-coa dehydrogenase (EC:1.1.1.157)                                                | 216 | <i>Streptomyces cavourensis</i>           | 100 | 0         | WP_114933434.1 |
| S6.peg.5337 | 3-hydroxybutyryl-coa dehydrogenase (EC:1.1.1.157)                                                | 216 | <i>Streptomyces nanshensis</i>            | 99  | 0         | WP_070203026.1 |
|             | <b>Reductase</b>                                                                                 |     |                                           |     |           |                |
| S6.peg.8966 | Enoyl-(acyl-carrier-protein) reductase (NADH) I (EC 1.3.1.9)                                     | 251 | <i>Streptomyces sp.</i>                   | 100 | 0.00E+00  | WP_018488216.1 |
| S6.peg.4484 | NADPH2: quinone reductase (EC:1.6.5.5)                                                           | 195 | <i>Streptomyces sp.</i> WAC04770          | 98  | 0.00E+00  | WP_125618770.1 |
| S6.peg.6532 | NADPH2: quinone reductase (EC:1.6.5.5)                                                           | 195 | <i>Streptomyces fulvissimus</i>           | 91  | 1.00E-104 | WP_015610315.1 |
| S6.peg.7858 | Thioredoxin reductase (NADPH) (EC:1.8.1.9)                                                       | 323 | <i>Streptomyces sp.</i>                   | 100 | 0.00E+00  | WP_029395808.1 |

|             |                                                                                  |     |                                    |     |           |                |
|-------------|----------------------------------------------------------------------------------|-----|------------------------------------|-----|-----------|----------------|
| S6.peg.7957 | Ferredoxin (also known as flavodoxin) ---NADP+ reductase (EC:1.18.1.2, 1.19.1.1) | 143 | <i>Streptomyces sp.</i> Dvalaa-19  | 98  | 2.00E-106 | SCD43580.1     |
| S6.peg.9124 | Ferredoxin (also known as flavodoxin) ---NADP+ reductase (EC:1.18.1.2, 1.19.1.1) | 453 | <i>Streptomyces sp.</i> CBMAI 2042 | 98  | 0.00E+00  | RLV71272.1     |
| S6.peg.1553 | Ferredoxin (also known as flavodoxin) ---NADP+ reductase (EC:1.18.1.2, 1.19.1.1) | 379 | <i>Streptomyces sp.</i> CBMAI 2042 | 95  | 0.00E+00  | RLV71303.1     |
|             | <b>Trasferase and Hydratase</b>                                                  |     |                                    |     |           |                |
| S6.peg.3490 | Glutathione S-transferase family protein                                         | 446 | <i>Streptomyces bacillaris</i>     | 99  | 0.00E+00  | WP_112489928.1 |
| S6.peg.118  | Acetyl-coa acyltransferase (EC:2.3.1.16)                                         | 608 | <i>Streptomyces sp.</i> WAC04770   | 99  | 0         | WP_125616349.1 |
| S6.peg.9078 | Enoyl-coa hydratase (EC:4.2.1.17)                                                | 187 | <i>Streptomyces sp.</i> WAC04770   | 97  | 2.00E-109 | RST19853.1     |
| S6.peg.2567 | Enoyl-coa hydratase (EC:4.2.1.17)                                                | 269 | <i>Streptomyces cavourensis</i>    | 99  | 0.00E+00  | WP_114933394.1 |
| S6.peg.2690 | Crotonase(also known as enoyl-coa hydratase) family protein (EC:4.2.1.17)        | 194 | <i>Streptomyces nanshensis</i>     | 96  | 2.00E-88  | WP_070203040.1 |
| S6.peg.4162 | Enoyl-coa hydratase (EC:4.2.1.17)                                                | 105 | <i>Streptomyces nanshensis</i>     | 97  | 6.00E+65  | WP_070203146.1 |
| S6.peg.5546 | Enoyl-coa hydratase (EC:4.2.1.17)                                                | 231 | <i>Streptomyces nanshensis</i>     | 100 | 4.00E-77  | WP_070200156.1 |
| S6.peg.5849 | Enoyl-coa hydratase (EC:4.2.1.17)                                                | 126 | <i>Streptomyces nanshensis</i>     | 100 | 4.00E-81  | WP_070200084.1 |
| S6.peg.5996 | Enoyl-coa hydratase (EC:4.2.1.17)                                                | 124 | <i>Streptomyces sp.</i> ZL-24      | 99  | 4.00E-75  | WP_103421645.1 |
| S6.peg.1941 | Acetyl-coa C-acetyltransferase (EC:2.3.1.9)                                      | 92  | <i>Streptomyces nanshensis</i>     | 98  | 5.00E-60  | WP_070203508.1 |
| S6.peg.1942 | Acetyl-coa C-acetyltransferase (EC:2.3.1.9)                                      | 293 | <i>Streptomyces nanshensis</i>     | 99  | 0         | WP_070203508.2 |
| S6.peg.8855 | Acetyl-coa C-acetyltransferase (EC:2.3.1.9)                                      | 359 | <i>Streptomyces sp.</i>            | 100 | 0         | WP_028417635.1 |

|             |                                                                         |     |                                     |     |           |                |
|-------------|-------------------------------------------------------------------------|-----|-------------------------------------|-----|-----------|----------------|
| S6.peg.677  | Acetyl-coa C-acetyltransferase (EC:2.3.1.9)                             | 79  | <i>Streptomyces sp.</i> Cmucl-a718b | 100 | 1.00E-72  | SCF60550.1     |
| S6.peg.2248 | Acetyl-coa C-acetyltransferase (EC:2.3.1.9)                             | 265 | <i>Streptomyces sp.</i> Dvalaa-19   | 100 | 0         | SCD86657.1     |
| S6.peg.2249 | Acetyl-coa C-acetyltransferase (EC:2.3.1.9)                             | 88  | <i>Streptomyces sp.</i> S8          | 100 | 1.00E-79  | ARI52225.1     |
| S6.peg.3867 | Acetyl-coa C-acetyltransferase (EC:2.3.1.9)                             | 388 | <i>Streptomyces sp.</i> CBMAI 2042  | 97  | 0         | RLV64571.1     |
| S6.peg.7015 | Acetyl-coa C-acetyltransferase (EC:2.3.1.9)                             | 84  | <i>Streptomyces cavourensis</i>     | 100 | 3.00E-75  | WP_114933290.1 |
| S6.peg.2831 | 3-oxoacid coa-transferase subunit A (EC:2.8.3.5)                        | 183 | <i>Streptomyces sp.</i>             | 99  | 3.00E-177 | WP_028416463.1 |
| S6.peg.2830 | 3-oxoacid coa-transferase subunit B (EC:2.8.3.5)                        | 246 | <i>Streptomyces sp.</i> ZL-24       | 97  | 0.00E+00  | WP_103417324.1 |
| S6.peg.7828 | Histidinol-phosphate aminotransferase (EC:2.6.1.9)                      | 246 | <i>Streptomyces bacillaris</i>      | 100 | 0         | WP_112490944.1 |
| S6.peg.8867 | Histidinol-phosphate aminotransferase (EC:2.6.1.9)                      | 376 | <i>Streptomyces nanshensis</i>      | 100 | 0         | WP_070203175.1 |
| S6.peg.9048 | Histidinol-phosphate aminotransferase (EC:2.6.1.9)                      | 73  | <i>Streptomyces sp.</i>             | 100 | 4.00E-66  | WP_019767214.1 |
| S6.peg.5562 | Aminotransferase                                                        | 166 | <i>Streptomyces sp.</i> S8          | 100 | 1.00E-163 | ARI56717.1     |
| S6.peg.1023 | Aconitate hydratase (EC:4.2.1.3)                                        | 904 | <i>Streptomyces sp.</i>             | 100 | 0         | WP_070202447.1 |
| S6.peg.6887 | 2-keto-4-pentenoate hydratase/2-oxohepta-3-ene-1,7-dioic acid hydratase | 261 | <i>Streptomyces nanshensis</i>      | 100 | 0         | WP_070199299.1 |
|             | <b>Cytochrome P450</b>                                                  |     |                                     |     |           |                |
| S6.peg.80   | Cytochrome P450                                                         | 108 | <i>Streptomyces sp.</i> Ccalmp-8W   | 94  | 1.00E-96  | WP_018491359.1 |
| S6.peg.2869 | Cytochrome P450                                                         | 210 | <i>Streptomyces sp.</i>             | 100 | 0.00E+00  | WP_114934335.1 |
| S6.peg.4373 | Cytochrome P450                                                         | 106 | <i>Streptomyces cavourensis</i>     | 100 | 7.00E-98  | WP_119827421.1 |
| S6.peg.5470 | Cytochrome P450                                                         | 442 | <i>Streptomyces sp.</i> CFMR 7      | 90  | 0.00E+00  | WP_053559918.1 |

|             |                 |     |                                 |     |           |                |
|-------------|-----------------|-----|---------------------------------|-----|-----------|----------------|
| S6.peg.5520 | Cytochrome P450 | 145 | <i>Streptomyces bacillaris</i>  | 93  | 4.00E-118 | WP_112489573.1 |
| S6.peg.5966 | Cytochrome P450 | 93  | <i>Streptomyces cavourensis</i> | 99  | 4.00E-86  | WP_119827421.1 |
| S6.peg.7439 | Cytochrome P450 | 455 | <i>Streptomyces</i> sp.         | 99  | 0.00E+00  | WP_103417149.1 |
| S6.peg.7758 | Cytochrome P450 | 107 | <i>Streptomyces nanshensis</i>  | 100 | 2.00E-105 | WP_070202884.1 |

**Table S3. Putative genes involved in metabolism of central aromatic intermediates**

| Feature ID                                                    | Function                                                      | Size (amino acid) | Organism                         | % Identity | E-value   | Accession No.  |
|---------------------------------------------------------------|---------------------------------------------------------------|-------------------|----------------------------------|------------|-----------|----------------|
| <b>Catechol branch of beta-ketoadipate pathway</b>            |                                                               |                   |                                  |            |           |                |
| S6.peg.1360                                                   | Catechol 2,3-dioxygenase [EC:1.13.11.2]                       | 328               | <i>Streptomyces bacillaris</i>   | 100        | 0         | WP_112491598.1 |
| S6.peg.6883                                                   | 3-carboxy-cis, cis-muconate cycloisomerase [EC:5.5.1.2]       | 126               | <i>Streptomyces nanshensis</i>   | 99         | 2.00E-80  | WP_070204345.1 |
| S6.peg.2831                                                   | 3-oxoacid coa-transferase subunit A [EC:2.8.3.5]              | 183               | <i>Streptomyces</i> sp.          | 99         | 3.00E-177 | WP_028416463.1 |
| S6.peg.2830                                                   | 3-oxoacid coa-transferase subunit B [EC:2.8.3.5]              | 246               | <i>Streptomyces</i> sp. ZL-24    | 97         | 0.00E+00  | WP_103417324.1 |
| S6.peg.2436                                                   | 3-oxoadipate--succinyl-coa transferase subunit B [EC:2.8.3.5] | 278               | <i>Streptomyces</i> sp. ZL-24    | 98         | 0         | WP_103417509.1 |
| S6.peg.9253                                                   | 3-oxoadipate: succinyl-coa transferase                        | 358               | <i>Streptomyces</i> sp. CFMR 7   | 100        | 0         | ALC26674.1     |
| <b>Homogentisate pathway of aromatic compound degradation</b> |                                                               |                   |                                  |            |           |                |
| S6.peg.7148                                                   | Homogentisate 1,2-dioxygenase [EC:1.13.11.5]                  | 353               | <i>Streptomyces nanshensis</i>   | 97         | 0         | WP_070200509.1 |
| S6.peg.2711                                                   | 4-hydroxyphenylpyruvate dioxygenase [EC:1.13.11.27]           | 381               | <i>Streptomyces cavourensis</i>  | 99         | 0         | WP_114931377.1 |
| S6.peg.3671                                                   | Fumarylacetoacetase [EC:3.7.1.2]                              | 75                | <i>Streptomyces nanshensis</i>   | 100        | 4.00E-58  | WP_070205452.1 |
| S6.peg.4185                                                   | Fumarylacetoacetase [EC:3.7.1.2]                              | 342               | <i>Streptomyces</i> sp. WAC04770 | 99         | 0         | WP_019764689.1 |
| S6.peg.1023                                                   | Aconitate hydratase acna [EC:4.2.1.3]                         | 904               | <i>Streptomyces</i>              | 100        | 0         | WP_070202447.1 |
| S6.peg.7828                                                   | Histidinol-phosphate aminotransferase [EC:2.6.1.9]            | 246               | <i>Streptomyces bacillaris</i>   | 100        | 0         | WP_112490944.1 |
| S6.peg.8867                                                   | Histidinol-phosphate aminotransferase [EC:2.6.1.9]            | 376               | <i>Streptomyces nanshensis</i>   | 100        | 0         | WP_070203175.1 |

|                                            |                                                                         |     |                                     |     |           |                |
|--------------------------------------------|-------------------------------------------------------------------------|-----|-------------------------------------|-----|-----------|----------------|
| S6.peg.9048                                | Histidinol-phosphate aminotransferase [EC:2.6.1.9]                      | 73  | <i>Streptomyces</i>                 | 100 | 4.00E-66  | WP_019767214.1 |
| <b>Salicylate and gentisate catabolism</b> |                                                                         |     |                                     |     |           |                |
| S6.peg.6243                                | NAD(P)-dependent alcohol dehydrogenase [EC:1.1.1.90]                    | 205 | <i>Streptomyces cavourensis</i>     | 99  | 4.00E-86  | WP_114933918.1 |
| S6.peg.6244                                | Aryl-alcohol dehydrogenase [EC:1.1.1.90]                                | 114 | <i>Streptomyces nanshensis</i>      | 69  | 1.00E-36  | WP_070200123.1 |
| S6.peg.3671                                | Fumarylacetoacetase [EC:3.7.1.2]                                        | 75  | <i>Streptomyces nanshensis</i>      | 100 | 4.00E-58  | WP_070205452.1 |
| S6.peg.4185                                | Fumarylacetoacetase [EC:3.7.1.2]                                        | 342 | <i>Streptomyces sp.</i><br>WAC04770 | 99  | 0         | WP_019764689.1 |
| S6.peg.6887                                | 2-keto-4-pentenoate hydratase/2-oxohepta-3-ene-1,7-dioic acid hydratase | 261 | <i>Streptomyces nanshensis</i>      | 100 | 0         | WP_070199299.1 |
| S6.peg.3366                                | 2-hydroxyhepta-2,4-diene-1,7-dioate isomerase                           | 218 | <i>Streptomyces nanshensis</i>      | 100 | 2.00E-157 | OEV19985.1     |

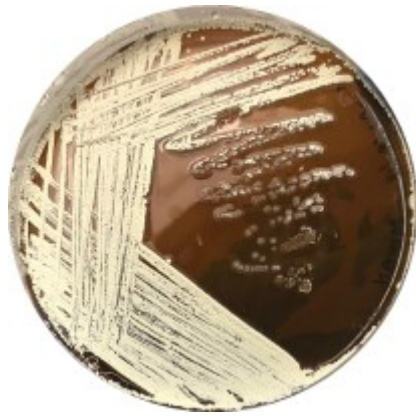

**Figure S1.** Growth of isolated strain S6 in solid media containing alkali lignin as sole carbon source

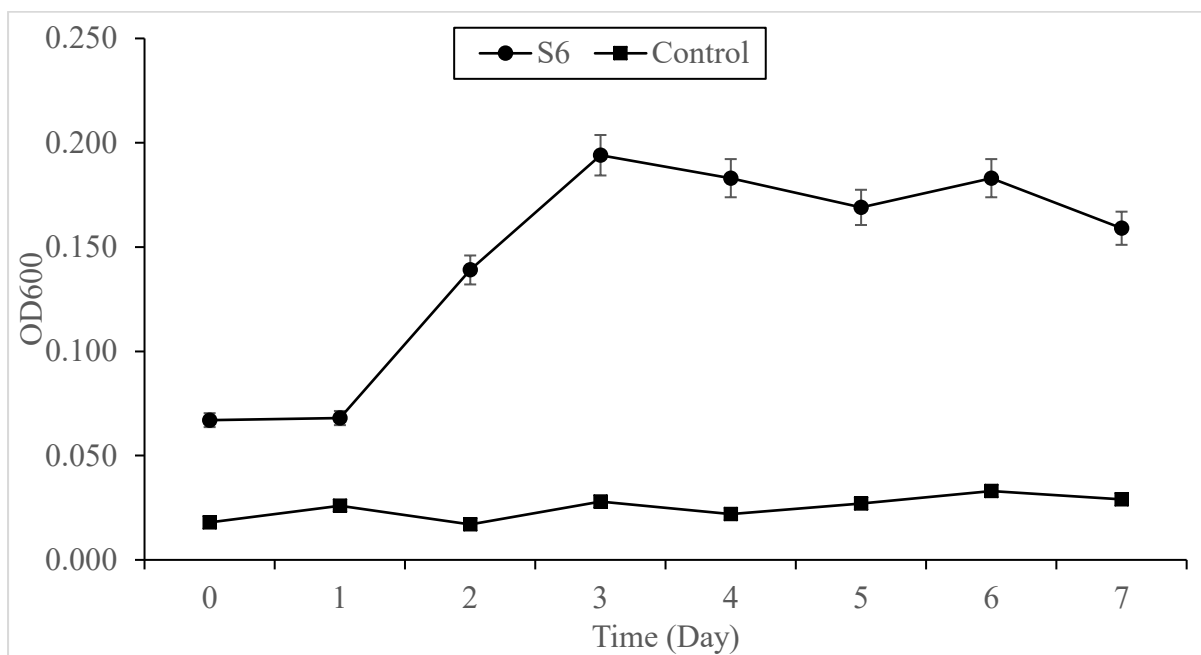

**Figure S2.** Growth curve of strain S6 in liquid medium containing alkali lignin as sole carbon source. A non-inoculated control is shown with a square marker line.



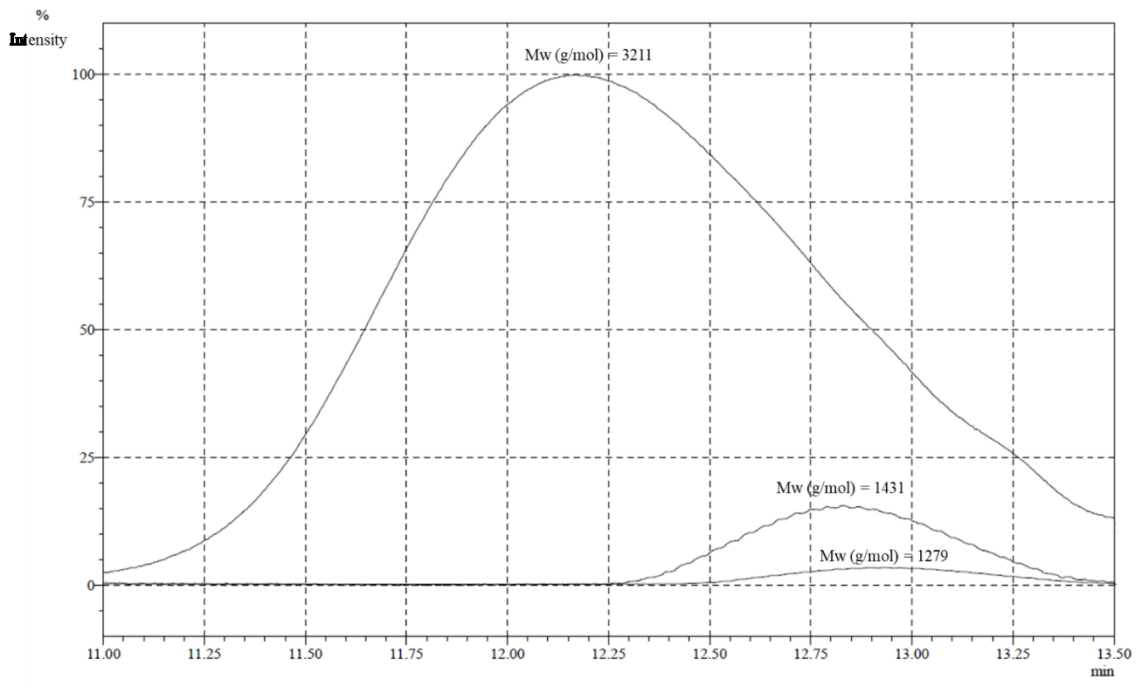

**Figure S3.** GPC chromatogram data of the isolated strain S6 at (i) Control (untreated KL without S6), (ii) day 3 and (iii) day 7.

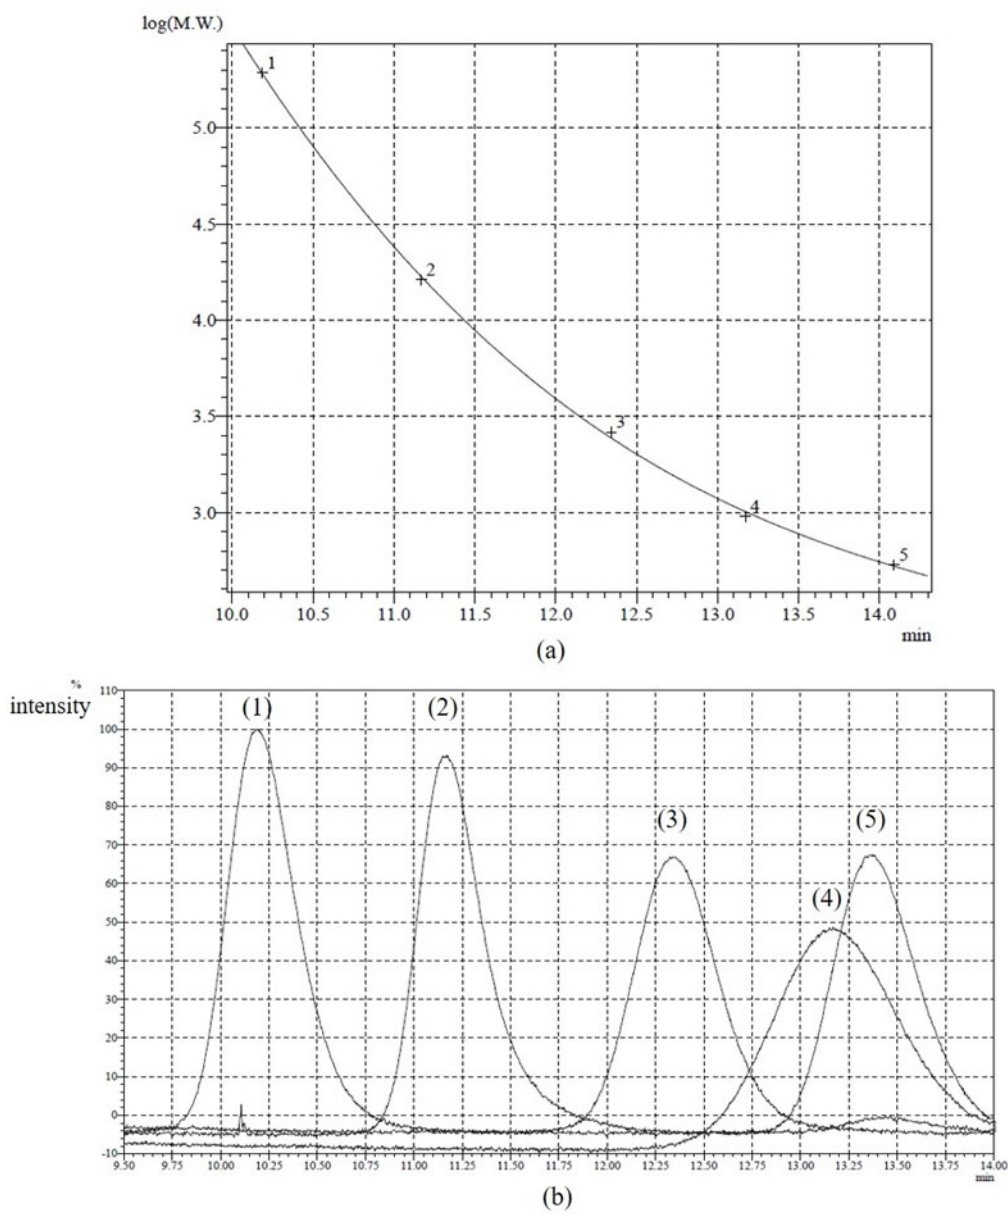

**Figure S4:** GPC chromatogram illustrating the lignin standard markers of the (a) calibration line and (b) molecular weight (1): 193 000 Da, (2): 16 200 Da, (3): 2 620 Da, (4): 953 Da, (5): 533 Da

A.

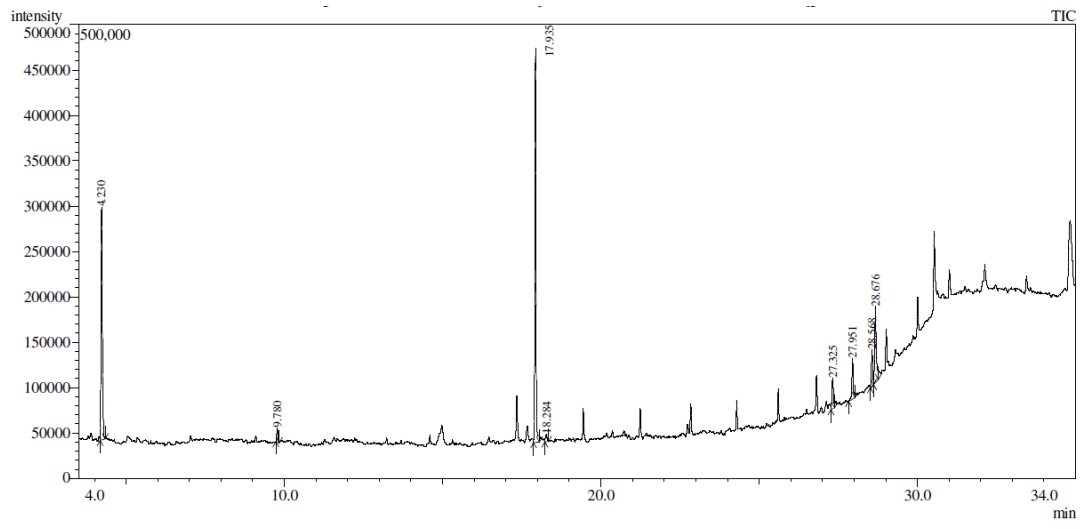

**B.**

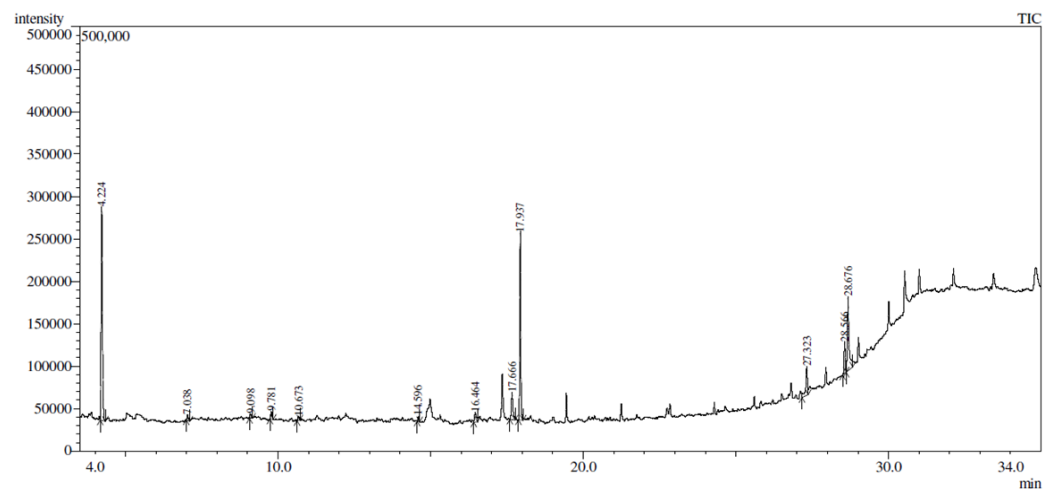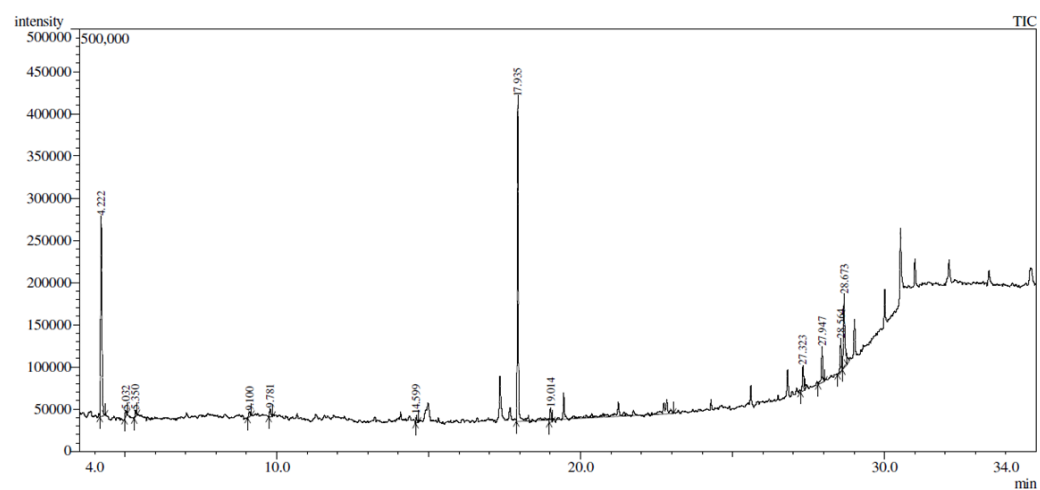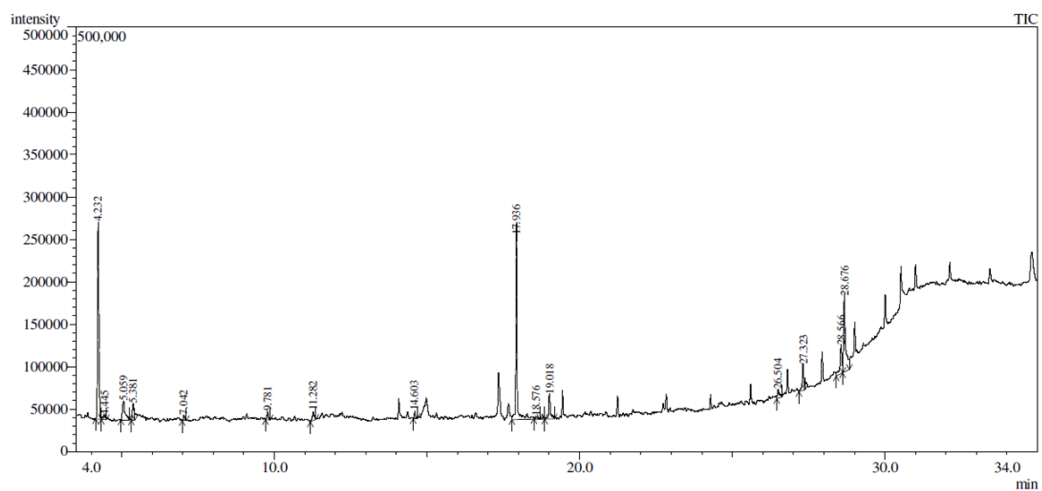

**Figure S5.** A: TIC of metabolites produced by control (untreated samples) B: TIC of metabolites produced by S6 from KL degradation (a) day 0, (b) day 3, and (c) day 7
